# Supplementary material for: Multi-model simulations of springtime dust storms in East Asia: Implications of an evaluation of four commonly used air quality models (CMAQv5.2.1, CAMxv6.50, CHIMEREv2017r4, and WRF-Chem v3.9.1)
Source: Copernicus journal article supplement (doi:10.5194/gmd-2019-57), 2019-04-15
Supplement: Supplementary file [file gmd-2019-57-AC2-supplement.pdf]

Dear Dr. Theodore Letcher:

Thanks for your helpful comment and interests on our manuscript “Multi-model simulations of springtime dust storms in East Asia: Implications of an evaluation of four commonly used air quality models (CMAQ v5.2.1, CAMx v6.50, CHIMERE v2017r4, and WRF-Chem v3.9.1)”.

As registered member of WRF-Chem community, we always updated our used WRF-Chem model according to the emails of bug reports. Thus, we corrected the bug in UOC source code (module\_qf03.F) before ran the simulations. However, we find that we didn't make it clearly expressed in the manuscript and it will misunderstand the readers. Now we revise the expression into “Note that the last term in the saltation flux formula in UOC source code is expressed as  $(1 + (\frac{u_{*t}}{u_*})^2)$  by error in WRF-Chem before the version of 4.0. In this study, it has been changed into  $(1 + \frac{u_{*t}}{u_*})^2$  in WRF-Chem version 3.9.1 according to the description in Shao et al. (2011).” in Section 2.4.1 of the manuscript. And we uploaded all the source codes with modifications and even the pre-/post-processing scripts to the Zenodo according to the suggestion of Editor David Ham in short comment 3.

Thank you again for your valuable suggestion that have helped us to improve our manuscript.
